# Supplementary material
Source: MDPI journal article supplement (https://www.mdpi.com/2035-8377/15/4/80)
Supplement: s1 [file s1]

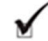

| Topic                       | Item | Checklist item description                                                                                   | Reported on Line                                                    |
|-----------------------------|------|--------------------------------------------------------------------------------------------------------------|---------------------------------------------------------------------|
| Title                       | 1    | The diagnosis or intervention of primary focus followed by the words "case report" .....                     | Heading                                                             |
| Key Words                   | 2    | 2 to 5 key words that identify diagnoses or interventions in this case report, including "case report" ...   | After abstract                                                      |
| Abstract<br>(no references) | 3a   | Introduction: What is unique about this case and what does it add to the scientific literature? .....        | abstract                                                            |
|                             | 3b   | Main symptoms and/or important clinical findings .....                                                       | abstract                                                            |
|                             | 3c   | The main diagnoses, therapeutic interventions, and outcomes .....                                            | abstract                                                            |
|                             | 3d   | Conclusion—What is the main "take-away" lesson(s) from this case? .....                                      | abstract                                                            |
| Introduction                | 4    | One or two paragraphs summarizing why this case is unique (may include references) .....                     | 1st and 2nd paragraph of intro                                      |
| Patient Information         | 5a   | De-identified patient specific information. ....                                                             | 1st para in case presentation                                       |
|                             | 5b   | Primary concerns and symptoms of the patient. ....                                                           | as above                                                            |
|                             | 5c   | Medical, family, and psycho-social history including relevant genetic information .....                      | 1st para in case presentation last sentence                         |
|                             | 5d   | Relevant past interventions with outcomes .....                                                              | not relevant                                                        |
| Clinical Findings           | 6    | Describe significant physical examination (PE) and important clinical findings. ....                         | Acute hospitalization 1st para                                      |
| Timeline                    | 7    | Historical and current information from this episode of care organized as a timeline .....                   | Figure 1                                                            |
| Diagnostic<br>Assessment    | 8a   | Diagnostic testing (such as PE, laboratory testing, imaging, surveys) .....                                  | During entire spectrum of followup                                  |
|                             | 8b   | Diagnostic challenges (such as access to testing, financial, or cultural) .....                              | During entire spectrum of followup                                  |
|                             | 8c   | Diagnosis (including other diagnoses considered) .....                                                       | During entire spectrum of followup                                  |
|                             | 8d   | Prognosis (such as staging in oncology) where applicable .....                                               | non applicable                                                      |
| Therapeutic<br>Intervention | 9a   | Types of therapeutic intervention (such as pharmacologic, surgical, preventive, self-care) .....             | During entire spectrum of followup                                  |
|                             | 9b   | Administration of therapeutic intervention (such as dosage, strength, duration) .....                        | During entire spectrum of followup                                  |
|                             | 9c   | Changes in therapeutic intervention (with rationale) .....                                                   | During entire spectrum of followup                                  |
| Follow-up and<br>Outcomes   | 10a  | Clinician and patient-assessed outcomes (if available) .....                                                 | non-applicable                                                      |
|                             | 10b  | Important follow-up diagnostic and other test results .....                                                  | During long term followup                                           |
|                             | 10c  | Intervention adherence and tolerability (How was this assessed?) .....                                       | During long term of followup                                        |
|                             | 10d  | Adverse and unanticipated events .....                                                                       | During acute care                                                   |
| Discussion                  | 11a  | A scientific discussion of the strengths AND limitations associated with this case report .....              | Limitation section                                                  |
|                             | 11b  | Discussion of the relevant medical literature with references. ....                                          | Across discussion section                                           |
|                             | 11c  | The scientific rationale for any conclusions (including assessment of possible causes) .....                 | conclusion section                                                  |
|                             | 11d  | The primary "take-away" lessons of this case report (without references) in a one paragraph conclusion ..... | conclusion and abstract                                             |
| Patient Perspective         | 12   | The patient should share their perspective in one to two paragraphs on the treatment(s) they received. ....  | provided                                                            |
| Informed Consent            | 13   | Did the patient give informed consent? Please provide if requested .....                                     | Yes <input checked="" type="checkbox"/> No <input type="checkbox"/> |

Supplementary Figure S1. the CARE guidelines [12].
